# Supplementary material for: GSTT1 Copy Number Gain and ZNF Overexpression Are Predictors of Poor Response to Imatinib in Gastrointestinal Stromal Tumors
Source: PubMed Central journal article supplement (PMC3790698; doi:10.1371/journal.pone.0077219), 2013-10-04
Supplement: pone.0077219.s001.pdf [file pone.0077219.s001.pdf]

**Table S1. Clinicopathologic features and array comparative genomic hybridization results of 32 gastric gastrointestinal stromal tumors.**

| Case No. | Gender /Age (yr) | Risk of progression | KIT and PDGFRA genotype | DNA copy number changes                                                                                                                                                                                                                                                                                                                                                                                                                                                                                                                                                                                                                                                                                                                                                                                                                                 | Recurrence or metastasis |
|----------|------------------|---------------------|-------------------------|---------------------------------------------------------------------------------------------------------------------------------------------------------------------------------------------------------------------------------------------------------------------------------------------------------------------------------------------------------------------------------------------------------------------------------------------------------------------------------------------------------------------------------------------------------------------------------------------------------------------------------------------------------------------------------------------------------------------------------------------------------------------------------------------------------------------------------------------------------|--------------------------|
| 1        | F / 67           | very low            | KIT exon 11 missense    | -1q21.3, -1q42.13, -2p15, -2p11.2-p11.1, +3p26.3, -3q26.1, +5p15.33, +5p15.33-p11, +5q11.1-q35.3, -5q31.3, -5q35.2, -6p21.33, -6p21.32, -11p15.4, -11q11, -11q23.1, -14q11.2, +14q11.2, -14q24.3, +14q32.33, +15q11.1-q11.2, -16p12.2, -16q22.1, -16q23.1, -17q12, -17q25.3, -22q11.21, -22q11.23, -22q13.2, -Yp11.31-p11.2, -Yp11.2, +Yp11.2, -Yq11.21-q11.23<br>+1p36.33, -1p36.33, -1q21.2, -1q42.13, -2p15, -2q37.3, -3q26.1, -4q13.2, -6p25.3, -6p22.1, -6p21.32, +7p22.3, +7q36.1, +7q36.2, +8p11.22, -8q24.3, -9q34.3, +10q26.3, +11q11, +12p13.2, -13q21.1, -13q21.31, -14q11.2-q32.33, +15q11.1-q11.2, -16p13.11, -16p11.2, -16q12.2, +16q12.2, -16q22.1, -16q23.1, -16q24.2, -17q25.3, +18q22.3-q23, -19p13.3, -20p13, -22q11.21, -22q11.23, -Xp22.33-p11.1, -Xq11.1-q27.1, -Xq21.31-q21.32, -Xq27.1-q28, +Yp11.31, +Yp11.2, +Yq11.21-q11.223 | no                       |
| 2        | M / 68           | very low            | KIT exon 11 missense    | +1p21.1, +1q21.3, +1q44, -2q23.3, -3q26.1, +4p11, -4q13.2, -4q31.21, -5q31.3, -6p22.1, +7p22.3, -7q35, +8p11.22, -11p15.5-p11.12, -11q11, -12p12.3, -14q24.3, -14q32.33, +15q11.1-q11.2, -15q13.1-q13.3, -15q14-q26.3, -16p13.11, -16q12.2, +16q12.2, -16q22.1, -16q23.1<br>-1p36.13, -1p12, -1q21.3, -3q26.1, -4q13.2, -5q13.2, -5q31.3, -6p22.1, -6p21.32, +8p23.2, +8p11.22, -8q12.3, -9p24.3-p11.2, -9q13-q34.3, +11q11, -13q21.31, -14q11.1-q32.33, +15q11.1-q11.2, -15q14, -16p13.11, +16p11.2, -16p11.2, -17q21.32, -17q25.3, +20p13, -22q11.1-q13.33                                                                                                                                                                                                                                                                                            | no                       |
| 3        | F / 78           | very low            | KIT exon 11 missense    | +1q21.2, +2p13.1, -3q26.1, -4q13.2, -5q31.3, -6p21.32, +8p11.22, +11p15.4, +11q11, +11q25, -13q14.12, +14q11.2, -14q32.33, -15q11.2, -15q15.3, -16p13.11, -16p12.2, -16q12.2, +16q12.2, -16q24.2, -17q21.31, -17q25.3, +19q13.32, -20p13, -Xp11.23, +Xq28                                                                                                                                                                                                                                                                                                                                                                                                                                                                                                                                                                                               | no                       |
| 4        | F / 61           | very low            | KIT exon 11 deletion    |                                                                                                                                                                                                                                                                                                                                                                                                                                                                                                                                                                                                                                                                                                                                                                                                                                                         | no                       |
| 5        | M / 70           | very low            | KIT exon 11 deletion    |                                                                                                                                                                                                                                                                                                                                                                                                                                                                                                                                                                                                                                                                                                                                                                                                                                                         | no                       |

|    |        |          |                      |                                                                                                                                                                                                                                                                                                                                                                                                                                                                                                                                                                                                                                                                                                                         |    |
|----|--------|----------|----------------------|-------------------------------------------------------------------------------------------------------------------------------------------------------------------------------------------------------------------------------------------------------------------------------------------------------------------------------------------------------------------------------------------------------------------------------------------------------------------------------------------------------------------------------------------------------------------------------------------------------------------------------------------------------------------------------------------------------------------------|----|
| 6  | M / 52 | very low | KIT exon 11 deletion | -1p35.1, -1q21.3, -2p11.2, -2q33.1, -3p21.2, -4q28.2, -5q13.1-q13.2, -5q23.2, -5q31.1, +6p21.32, -6q13, -6q21, -6q25.1, -7p11.2, -7q22.3, -7q36.1, +8p23.3-p23.2, +8p23.1, +8p11.22, -9p24.1, -9p13.3, -11p15.4, -11p15.1, -12p13.33, -12p13.31, +12p13.31, -12p12.3, -14q11.1-q32.33, +15q11.1-q11.2, -15q22.31, -16p12.2, +16q12.2, -16q21, -17q12, -17q21.31, -20p13, -21q22.12-q22.13, -22q11.1-q13.33                                                                                                                                                                                                                                                                                                              | no |
| 7  | M / 35 | very low | KIT exon 11 deletion | -1p36.33, +1p36.13, +1q21.3, -1q24.2-q31.1, -1q32.3-q44, -3q21.3, -3q26.1, -3q29, +5p15.33, +5q11.2-q35.3, -6p21.32, +8p11.22, -9q34.3, -10q24.1, -11q11, -12q24.33, -13q34, -14q11.2-q32.33, -16p13.11, -16q22.1, -16q22.2, -16q24.3, -17q21.31, -19q13.42, +20p13, -21q22.3, -22q13.1, -22q13.2                                                                                                                                                                                                                                                                                                                                                                                                                       | no |
| 8  | F / 68 | very low | KIT exon 17 missense | -1p36.33, -1p36.21, -1q21.3, -1q32.1, -1q42.13, -1q44, -2q21.1, -2q21.2, -2q37.3, -3p21.31, -3q26.1, -4q13.2, +4q32.2, -5q35.2, -6p24.3, -6p21.33, -6p21.32, +6q27, -7p11.2, -7q11.23, -7q22.1, +8p11.22, +8p11.21, -9p13.1-p11.2, -9q34.2, -9q34.3, -11p15.5, -11p11.12, -11q11, -12p13.31, -12q13.12, -13q12.11, +14q11.2, -14q24.3, -14q32.33, -15q11.1-q11.2, -15q13.3, -15q24.3, -15q26.1, -16p13.3, +16q12.2, -16q24.2, +17p13.3, -17p13.1, -17q11.2, -17q25.3, -18q21.1, -19p13.3, -19p13.11, -19q13.12, -19q13.31, -19q13.42, -19q13.43, -20p13, -20q11.22, -21q11.2, -21q22.11, -22q11.21, -22q11.23, -22q13.1, -Xp22.31, -Xp11.23, -Xp11.22, -Xq21.31-q21.32, -Xq28, -Yp11.31-p11.2, +Yp11.2, -Yq11.21-q11.23 | no |
| 9  | F / 52 | low      | wild-type            | -1p36.33-p11.2, +1p36.13, -1q21.2, -1q21.3, -1q25.2, -1q42.13, -2q21.1, +2q21.2, -2q37.3, -3p25.2, -3q26.1, +3q29, -4q13.2, +4q32.2, +5p15.33, +5q35.2, -6p22.1, +6p21.32, -6q21, -7q11.23, -7q35, +8p11.22, -9p13.1-p11.2, -9q21.32, -9q34.3, -10q23.2, -11p15.5, -11q11, -11q22.3, -12p13.33, -12p13.31, +12p13.31, -12q13.12, -14q13.1-q13.2, -14q32.33, +15q11.1-q11.2, -15q14, -16p13.11, +16q12.2, -16q24.2, -17q11.2, +17q12, -17q21.32, -17q25.3, -18q21.1, -19p13.3-p12, -19q11-q13.2, -19q13.31-q13.43, -20p13, -21q22.11, -22q11.1-q13.33, -Xp11.22, -Xq28, -Yp11.31-p11.2, +Yp11.2, -Yq11.21-q11.223, -Yq11.23                                                                                              | no |
| 10 | M / 75 | low      | wild-type            | +1p36.13, +1q21.2, -1q42.13, -3q26.1, -3q29, -4q13.2, -6p21.32, -8p23.1, +8p11.22, -8q23.3, -9q34.3, +12p13.31, -14q11.2-q32.33, -16p13.11, -16q22.1, -16q23.1, -17q21.31, -17q25.3, +20p13, +22q11.23                                                                                                                                                                                                                                                                                                                                                                                                                                                                                                                  | no |

|    |        |     |                      |                                                                                                                                                                                                                                                                                                                                                                                                                                                                                                                                                                                                                                             |    |
|----|--------|-----|----------------------|---------------------------------------------------------------------------------------------------------------------------------------------------------------------------------------------------------------------------------------------------------------------------------------------------------------------------------------------------------------------------------------------------------------------------------------------------------------------------------------------------------------------------------------------------------------------------------------------------------------------------------------------|----|
| 11 | M / 66 | low | wild- type           | -1p36.33-p11.2, +1q21.2, -1q21.3, -1q31.3, -1q32.1, -1q42.13, -2p23.3, -2p22.2-p22.1, -2p16.1-p15, -2q37.3, -3q12.3, -3q26.1, +3q29, -4p14, -4q13.2, -4q13.3, -4q32.3, -5q13.1-q13.2, -5q31.1, -5q31.2, -6p21.32, -6p21.31, -6q21, -7q11.23, +8q24.3, -9q21.32, -9q34.3, -10p11.22, -11p15.5, -11p15.1, +11q14.3, -11q23.3, -12p13.31, -12p12.1, +14q11.2, -14q13.1-q13.2, -14q24.3, -14q32.33, -15q11.1, -15q11.2-q26.3, -16p13.3, +16q12.2, -16q23.2, -16q24.2, -17q11.2, +17q21.32, -17q25.3, -18q21.1, -19p13.3-p12, -19q11-q13.43, -20p13, -21q22.11, -22q11.21, -22q11.23, +22q11.23-q12.1, -Xp22.33, -Xq24, -Xq28, -Yp11.2, -Yq11.23 | no |
| 12 | F / 34 | low | wild-type            | -1p13.3, -1q21.3, -3q26.1, +3q29, -4q13.2, +5p15.33, -6p21.33, -6p21.32, -7q35, +8p23.1, +8p11.22, -11p15.4, +11q11, +12p13.31, -13q21.1, -13q34, -14q24.3, -14q32.33, +15q11.1-q11.2, -16p13.11, -16q12.2, -16q22.1, -16q23.1, -17q21.31, -17q25.3, -19q13.31, +20p13, +22q11.23                                                                                                                                                                                                                                                                                                                                                           | no |
| 13 | M / 55 | low | KIT exon 11 missense | -1q31.3, +1q44, -1q44, -3p21.2, -3q26.1, -4q13.2, -5q13.1-q13.2, -6p21.32, -6q13, +7q35, -8p22, +12p13.31, -14q11.2-q32.33, +15q11.1-q11.2, -16p13.11, -16p12.2, -17q21.31, -22q13.1, +Yq11.222                                                                                                                                                                                                                                                                                                                                                                                                                                             | no |
| 14 | M / 65 | low | KIT exon 11 missense | +1q21.3, -1q43, -2q21.1, -2q33.1, -3p25.3, -3q26.1, -3q26.2, -4p14, -4q32.3, +5p15.33, -5q12.1, -5q31.1, +5q35.3, -6p21.32, -6q13, -6q15, -6q21, -7q36.1, -8p12, +8p11.22, -8q13.1, -8q13.3, -9p24.1, -9p12-p11.2, +9q34.2, +11p15.5, -11p15.1, -11q11, -11q22.3, -12p13.33, -12p13.31, -12q23.1, -12q24.33, -13q12.11, -13q34, -14q11.2-q32.33, -15q11.2, -15q14, -15q22.31, -16p13.11, +16p11.2, -16q23.1, -17p11.2, -17q21.31, +17q21.31, +17q21.32, -18p11.32, -19p13.3, +20p13, -21q22.12-q22.13, -21q22.2, -22q11.23, -Xp11.23                                                                                                        | no |
| 15 | M / 45 | low | KIT exon 11 missense | +1p36.33-p11.2, +1q21.1-q44, -1q21.3, -1q44, +2p25.3-p11.1, +2q11.1-q37.3, -3q21.3, -3q26.1, +3q29, +4p16.3-p11, +4q11-q13.2, -4q13.2, +4q13.2-q35.2, +5p15.33-p11, +5p13.2, +5q11.1-q35.3, +6p21.32, +6p12.1, -6q13, +7p22.3-p11.2, +7q11.21-q36.3, +8p23.3-p11.1, +8q11.1-q24.3, +9p24.3-p11.2, +9q13-q34.3, +11p15.5-p11.12, +11q11-q25, +12p13.33-p11.1, +12q11-q24.33, +12q24.23-q24.31, +13q11-q34, -14q11.2, +14q11.2, -14q24.3, +14q32.33, +15q11.1-q11.2, +16p13.3-p11.1, -16p13.11, +16q11.2-q24.3, -16q22.1, -16q23.1, +17p13.3-p11.2,                                                                                           | no |

|    |        |          |                         |                                                                                                                                                                                                                                                                                                                                                                                                                                              |    |
|----|--------|----------|-------------------------|----------------------------------------------------------------------------------------------------------------------------------------------------------------------------------------------------------------------------------------------------------------------------------------------------------------------------------------------------------------------------------------------------------------------------------------------|----|
|    |        |          |                         | +17q11.1-q25.3, +17q25.1, +17q25.3, +18p11.32-p11.21, +18q11.1-q23, +19p13.3-p12, +19q11-q13.43, -19q13.2, +20p13-p11.1, +20q11.21-q13.33, +21p11.2-p11.1, +21q11.2-q22.12, -21q21.3, +21q22.13-q22.3, -Xp11.4, -Xp11.23, -Xq24                                                                                                                                                                                                              |    |
| 16 | M / 56 | low      | KIT exon 11 duplication | +1p34.2, -1q21.3, -2q33.3, -3q26.1, -4q13.2, +5p15.33-p11, +5q11.1-q35.3, +6p21.33, -6p21.32, +6p21.32, -6q13, -6q21, -7p11.2, -7q32.2, -7q36.1, +8p23.3-p11.1, +8q11.1-q24.3, -11p15.1, -12p13.31, -12q13.3, -14q11.2, +14q32.33, -14q32.33, +15q11.1-q11.2, -15q15.1, +16p11.2, +17p13.3-p11.1, +17q11.1-q25.3, -17q21.31, +17q21.32, +18q11.1-q23, +20p13, -21q22.12-q22.13, -22q11.1-q13.33, +Xq13.2                                     | no |
| 17 | M / 73 | moderate | KIT exon 11 missense    | -1p13.3, -1q21.2, -1q21.3, -2p11.2, -4q13.2, -4q28.1-q28.2, -4q32.3, -5q13.1-q13.2, -5q23.2, -5q32, -6p21.32, -6q13, +7p22.3, -7q36.1, +8p23.1, -8q24.21, -9q33.3, -11p15.1, +11q11, -12p13.33, -13q31.3, -14q11.2-q32.33, -15q11.1-q11.2, +16p11.2, -16q12.2, +16q12.2, -16q24.2, -17q21.31, +20p13, -22q11.1-q13.33, -Xp22.11                                                                                                              | no |
| 18 | M / 77 | moderate | KIT exon 11 missense    | -1p36.21, -1q21.2, +1q21.3, -1q44, -3p14.1-p13, -3q26.1, -3q29, -4p14, +6p21.32, -7p21.2, +8p11.22, -10p15.1, -14q11.2-q32.33, -15q11.1-q11.2, -15q15.3, -16p13.11, -16p11.2, -17q21.31, +20p13, -22q11.23, -22q13.1                                                                                                                                                                                                                         | no |
| 19 | F / 76 | moderate | KIT exon 11 missense    | +1p21.1, -2q37.3, -3p26.3-p12.2, -3q11.1-q22.1, -3q26.1, -4q13.2, -6p22.1, +7q34, -9p12-p11.2, +10p11.23, +11q11, -13q21.1, -13q22.3-q34, -14q11.2-q31.2, -14q32.33, -16p13.11, +20p13, -22q13.1, +Yp11.2                                                                                                                                                                                                                                    | no |
| 20 | F / 81 | moderate | KIT exon 11 deletion    | -1q21.3, -3q26.1, -3q29, -4q13.2, +5p15.33, -6p22.1, +6p12.1, +7q34, +8p11.22, -14q11.2-q32.33, +15q11.1-q11.2, +16p11.2, +17q21.31, -22q11.1-q13.33                                                                                                                                                                                                                                                                                         | no |
| 21 | F / 47 | moderate | KIT exon 11 duplication | -1p36.33-p11.2, +1p36.21, -1q21.1-q44, -2q13, -3q26.1, -4p16.3-p11, -4q12-q35.2, -6p25.3-p11.2, -6q11.1-q27, -7p22.3-p11.2, -7q11.21-q36.3, +7q34, -8p23.1, +8p11.22, -9p12-p11.2, -10p15.3-p11.1, -10q11.21-q26.3, +11q11, -14q11.2-q32.33, -14q24.3, -14q32.33, +15q11.1-q11.2, -15q11.2-q26.3, -16p13.11, -16q22.1, -17q12, -17q25.3, -19q13.2-q13.31, -19q13.43, -21p11.2-p11.1, -21q11.2-q22.3, -22q11.1-q13.33, -Xq13.3-q21.1, -Yp11.2 | no |

|    |        |          |                         |                                                                                                                                                                                                                                                                                                                                                                                                                                                                                                                                                                                                                                                                                                                                          |                   |
|----|--------|----------|-------------------------|------------------------------------------------------------------------------------------------------------------------------------------------------------------------------------------------------------------------------------------------------------------------------------------------------------------------------------------------------------------------------------------------------------------------------------------------------------------------------------------------------------------------------------------------------------------------------------------------------------------------------------------------------------------------------------------------------------------------------------------|-------------------|
| 22 | F / 52 | moderate | KIT exon 11 deletion    | +1q21.3, -1q24.2, -4q13.2, -4q35.2, +5p15.33, -6p25.3, -6p21.32, -6q13, -9p12-p11.2, -9q21.11, +11q11, -14q11.2-q32.33, -16p13.11, -16q23.1, +Xq21.32                                                                                                                                                                                                                                                                                                                                                                                                                                                                                                                                                                                    | no                |
| 23 | F / 69 | moderate | KIT exon 11 deletion    | +1q21.3, +1q32.2, -1q44, -3q26.1, +5p15.33-p12, +5q11.1-q35.3, -6p22.1, -6p21.32, +7q34, +8p23.3-p11.1, +8q11.1-q24.3, +9p24.3-p11.2, +9q13-q34.3, -9q34.3, +11q11, -13q21.1, +14q11.2, -14q24.3, -14q32.33, +15q11.1-q11.2, -16p13.3, -16q12.2, +16q12.2, -16q24.1, +17p13.3-p11.2, +17q11.1-q25.3, -20p13, -22q11.23-q12.1, -22q13.1, +Yp11.2, -Yq11.21-q11.223                                                                                                                                                                                                                                                                                                                                                                        | no                |
| 24 | M / 72 | moderate | PDGFRA exon 18 missense | -1p36.33-p11.2, -1q21.1, +1q21.3, +2q37.1, +3p26.3, -4p16.3-p11, +4q32.2, -6p21.32, +7q35, -11p15.4, -11q11, +12p13.31, -14q11.2-q32.33, +16p13.3, -16q12.2, +16q12.2, -16q22.1, -17q21.31, -20p13, +20q13.13                                                                                                                                                                                                                                                                                                                                                                                                                                                                                                                            | no                |
| 25 | F / 53 | high     | KIT exon 11 missense    | -1p36.33, -1p36.32-p36.31, -1p36.22, +1p36.21, -1p36.21, -1q42.13, -2p25.3, -2p15, +2q21.2, -2q37.3, -3q12.3, -3q26.1, -4q13.2, -4q23, -5q13.1-q13.2, -5q35.3, -6p22.1, -6p21.32, -6q21, -7p22.1, +7p21.3, -7p11.2, -7q11.23, -7q36.1-q36.2, -8p23.3-p11.1, +8p11.22, +8q11.1-q24.3, -8q24.3, -9p21.3, -9p13.1-p11.2, -9q13-q31.2, -9q34.3, -10p15.3-p11.1, -10q24.32, -10q25.1-q26.3, -11p15.5-p13, -11p12-p11.12, -12p13.33, -12p13.31, -12q24.31, -14q11.2-q32.33, -15q11.1, -15q24.3, -16p13.11, -16p12.2, +16p11.2, -16q12.2, +16q12.2, -16q22.1, -16q24.2, -17q11.2, -17q12, -17q25.3, -18q21.1, -19p13.3, -20p13, -21q11.2, -21q22.11, -21q22.2, -22q11.23, -Xp22.33-p11.1, -Xq11.1-q28, -Yp11.31-p11.2, +Yp11.2, -Yq11.21-q11.23 | no                |
| 26 | M / 66 | high     | KIT exon 11 missense    | -1p36.33, +1p36.13, -1q42.13, +1q44, -1q44, -2q12.2, +2q37.1, -2q37.3, -3p25.2, -3p21.31, -3q26.1, -4q13.2, -6p21.33, -6p21.32, +8p23.1, +8p11.22, -8q13.1, -9q34.3, -11p15.4, +11q11, -12p13.33, -12p13.31, -14q11.2-q32.33, +15q11.1-q11.2, +15q15.3, -16p13.11, +16q12.2, -16q22.1, -16q23.1, -16q24.2, -17q21.31, -17q25.3, -19p13.3, -21q22.11, -21q22.12-q22.13, -22q11.23, -Xq28, -Yp11.2                                                                                                                                                                                                                                                                                                                                         | loss of follow-up |
| 27 | M / 60 | high     | KIT exon 11 deletion    | +1p36.33-p11.2, -1p36.21, -1p13.3, +1q21.1-q44, -1q21.3, +2p25.3-p11.1, +2q11.1-q37.3, -3q26.1, -4q13.2, -4q32.3, -4q35.1-q35.2, +5p15.33-p11, +5q11.1-q35.3, -5q13.2, +6p25.3-p11.2, -6p21.32, +6q11.1-q27, +7p22.3-p11.2, +7q11.21-q32.1, -7q34,                                                                                                                                                                                                                                                                                                                                                                                                                                                                                       | yes               |

|    |        |      |                         |                                                                                                                                                                                                                                                                                                                                                                                                                                                                                                                                                                                                                                                                                                                                                                                                                                                                                                                                                                                                                                                                                                                                                                                                                                                                               |     |
|----|--------|------|-------------------------|-------------------------------------------------------------------------------------------------------------------------------------------------------------------------------------------------------------------------------------------------------------------------------------------------------------------------------------------------------------------------------------------------------------------------------------------------------------------------------------------------------------------------------------------------------------------------------------------------------------------------------------------------------------------------------------------------------------------------------------------------------------------------------------------------------------------------------------------------------------------------------------------------------------------------------------------------------------------------------------------------------------------------------------------------------------------------------------------------------------------------------------------------------------------------------------------------------------------------------------------------------------------------------|-----|
|    |        |      |                         | <p>+7q36.2-q36.3, +8p23.3-p11.1, +8q11.1-q24.3, +11p15.5-p11.1.2, +11q11-q25, +12p13.33-p11.1, +12q11-q34.33, +13q11-q34, +14q11.2, -14q24.3, +14q32.33, -14q32.33, +15q11.1-q26.3, +16p13.3-p11.1, -16p13.11, +16q11.2-q24.3, -16q24.2, +17p13.3-p11.2, +17q11.1-q25.3, +19p13.3-p12, +19q11-q13.43, +20p13-p11.1, -20p13, +20q11.21-q13.33, +21p11.1, +21q11.2-q22.3, -22q11.23, -Xq22.3, +Xq27.1, +Xq27.3-q28</p>                                                                                                                                                                                                                                                                                                                                                                                                                                                                                                                                                                                                                                                                                                                                                                                                                                                          |     |
| 28 | M / 63 | high | KIT exon 11 deletion    | <p>+1p36.33-p36.32, -1p36.32-p36.22, -1p36.22-p34.3, +1p34.3-p11.2, +1q21.1-q44, -1q44, -2q37.3, -3p26.2-p26.1, -3p24.3-p24.1, -3p22.2-p21.31, -3p21.2-p14.3, -3q26.1, -4p14-p13, -4q13.2, -5p13.2, -6p25.3, +6p21.32, -7q31.1, +7q35, -8p23.3-p11.1, +8q11.1-q24.3, -9q22.32, -9q33.3-q34.3, +10q11.22, +11p15.5-p11.1.2, +11q11-q12.3, +11q13.2-q25, +12p13.31, +13q11-q12.11, -13q14.3-q21.31, -13q21.32-q22.3, -13q31.1-q34, -14q11.2-q32.12, -14q32.33, -15q11.2, +16p13.3-p11.1, -16p13.11, +16q11.2-q24.3, -17q21.31, +17q21.31, -22q11.23</p>                                                                                                                                                                                                                                                                                                                                                                                                                                                                                                                                                                                                                                                                                                                         | yes |
| 29 | M / 53 | high | KIT exon 11 duplication | <p>-1p36.33, -1p36.22, -1p36.21-p36.13, -1p36.11-p35.3, -1p35.2-p35.1, -1p32.3, -1p31.1, -1q21.2-q21.3, +1q21.3, -1q25.2, -1q32.1, -1q42.11-q42.12, -1q42.3, -1q44, +1q44, -2p23.1-p22.3, -2p22.2-p22.1, -2p21, -2p16.2, -2p16.1-p15, -2p13.3, -2q14.2-q14.3, -2q33.1, -2q33.3, -2q36.1, -2q36.3, -3p26.3-p11.1, -3q11.1-q29, -3q13.13, -3q21.2, -3q21.3, -3q22.3, -3q23, -3q26.1, -3q26.33-q27.3, -3q29, -4p14, -4q13.2, -4q13.3, -4q21.1, -4q25, -4q28.1-q28.2, -4q31.1, +5p15.33-p12, +5q11.1-q23.3, +5q31.1-q35.2, +5q35.3, -6p25.3-p11.2, -6q11.1-q27, +7p22.2, +7p22.1-p11.2, +7q11.22, +7q11.23-q21.3, +7q22.1-q32.1, +7q32.2-q33, +7q34-q36.3, -8p12, +8p11.22, -8p11.21-p11.1, -8q11.23, -8q12.1, -8q13.1, -8q13.3, -8q21.13, -8q22.1-q22.2, -8q24.12, -9p22.1, -9p13.3, -9q21.32, -9q22.32-q22.33, -9q33.3, -9q34.11, -10p15.3-p11.1, -10q11.21-q26.3, -11p15.4, -11p15.1, -11p11.2, -11q13.4, -11q22.3, -11q23.3, -12p13.33, -12p13.31, -12p12.3, -12q13.11-q13.13, -12q13.2-q13.3, -12q14.2-q14.3, -12q23.1, -12q24.11-q24.13, -12q24.23-q24.31, -12q24.33, -13q14.12-q14.13, -13q21.1, -13q32.1, -13q34, -14q11.2-q32.33, +14q32.33, -15q11.1-q26.3, -16p13.13, -16q22.1, -16q22.2, -16q23.1, -16q23.2, -17p13.3-p13.2, -17q11.2, -17q12, -17q21.2-q21.31, -</p> | no  |

|    |        |      |                       |                                                                                                                                                                                                                                                                                                                                                                                                                                                          |     |
|----|--------|------|-----------------------|----------------------------------------------------------------------------------------------------------------------------------------------------------------------------------------------------------------------------------------------------------------------------------------------------------------------------------------------------------------------------------------------------------------------------------------------------------|-----|
|    |        |      |                       | 17q22-q23.1, -17q24.2, -17q25.1, -18p11.31, -18q11.2, -18q12.1, -18q21.1, -18q21.2, +19p13.2, +19q11-q13.11, -19q13.2, +19q13.32, -19q13.33, -19q13.42, +19q13.43, -20q11.21, -20q13.2, +21q11.2-q22.12, +21q22.13-q22.3, +22q11.22-q11.23, -22q12.1, -22q12.2-q12.3, -22q13.1-q13.2, -Xp22.33-p11.1, -Xq11.1-q28, +Yp11.31-p11.2, +Yq11.21-q11.23                                                                                                       |     |
| 30 | F / 58 | high | KIT exon 11 insertion | -3q26.1, -4q13.2, +7q34, -14q11.2-q32.33, -16q12.2, +20p13, +22q11.23, -Xp22.33-p11.1, -Xq11.1-q28                                                                                                                                                                                                                                                                                                                                                       | no  |
| 31 | F / 63 | high | KIT exon 11 insertion | -1p36.33-p11.2, +1q21.3, -3q26.1, +5p15.33, -6p21.32, -6q12-q27, +7q34, +11q11, -12p12.3, -12q24.22-q24.33, -13q12.11, -14q11.2-q32.33, -15q22.31, -16q23.1, -17q21.31, -18p11.32-p11.21, -19p13.11-p12, -19q11-q13.43, +20p13, -22q11.22-q12.2, -22q11.23, -22q12.2-q13.33                                                                                                                                                                              | no  |
| 32 | M / 76 | high | KIT exon 11 deletion  | +1q21.3, -1q31.1, -2q37.1-q37.2, -2q37.3, -3p26.3-p24.3, -3q26.1, +3q29, -4q13.2, -6p21.32, +7p22.3-p11.2, +7q21.3-q22.3, +7q31.1-q36.3, +8p23.3-p11.1, +8q11.1-q21.2, -8q21.2, -8q21.3-q24.12, -9p21.3-p11.2, -9q13-q33.1, -9q33.3, -11p15.4, -11q11, -12q24.33, -13q21.1, -13q34, -14q11.2-q32.33, +15q11.1-q11.2, -16p13.11, -16q12.2, +16q12.2, -17q21.31, -19q13.31, -20p13, -21q11.2-q22.3, -22q11.23, +22q11.23-q12.1, -22q13.1, -Xp21.1, +Yp11.2 | yes |

---
