# Supplementary material for: GSTT1 Copy Number Gain and ZNF Overexpression Are Predictors of Poor Response to Imatinib in Gastrointestinal Stromal Tumors
Source: PubMed Central journal article supplement (PMC3790698; doi:10.1371/journal.pone.0077219), 2013-10-04
Supplement: pone.0077219.s002.pdf [file pone.0077219.s002.pdf]

**Table S2. Altered gene expressions in wild-type/PDGFR $\alpha$ -mutant gastrointestinal stromal tumors compared to KIT-mutant tumors.**

| <b>Genes</b> | <b>Location</b> | <b>Fold change</b> | <b>P value</b> |
|--------------|-----------------|--------------------|----------------|
| <i>BRAF</i>  | 7q34            | 0.50               | 0.001          |
| <i>NF1</i>   | 17q11.2         | 1.96               | <0.001         |
| <i>SDHA</i>  | 5p15            | -1.18              | 0.005          |
| <i>SDHB</i>  | 1p36.1-p35      | -0.96              | 0.041          |
| <i>SDHC</i>  | 1q23.3          | -3.23              | <0.001         |
| <i>SDHD</i>  | 11q23           | -0.85              | 0.025          |
| <i>VEGF</i>  | 6p12            | 2.31               | 0.025          |
| <i>IGF1R</i> | 15q26.3         | 2.76               | 0.062          |
| <i>MYC</i>   | 8q24.21         | 2.21               | 0.017          |
| <i>MDM2</i>  | 12q14.3-q15     | 2.54               | <0.001         |
| <i>CCND1</i> | 11q13           | 2.67               | 0.002          |
| <i>ETV1</i>  | 7p21.3          | -2.18              | 0.006          |
| <i>mTOR</i>  | 1p36.2          | -0.48              | 0.035          |
| <i>STAT3</i> | 17q21.31        | -0.64              | 0.004          |
