# Supplementary material for: GSTT1 Copy Number Gain and ZNF Overexpression Are Predictors of Poor Response to Imatinib in Gastrointestinal Stromal Tumors
Source: PubMed Central journal article supplement (PMC3790698; doi:10.1371/journal.pone.0077219), 2013-10-04
Supplement: pone.0077219.s003.pdf [file pone.0077219.s003.pdf]

**Table S3. Summary of molecular analyses for 32 gastric gastrointestinal stromal tumors.**

| Case No. | Array CGH | Gene expression array | qRT-PCR (GSTT1) | LOH analysis (SDHB) | Gender | Age (yr) | Risk of progression | KIT/PDGFRA genotype     |
|----------|-----------|-----------------------|-----------------|---------------------|--------|----------|---------------------|-------------------------|
| 1        | ○         |                       | ○               |                     | F      | 67       | very low            | KIT exon 11 missense    |
| 2        | ○         | ○                     | ○               |                     | M      | 68       | very low            | KIT exon 11 missense    |
| 3        | ○         | ○                     | ○               |                     | F      | 78       | very low            | KIT exon 11 missense    |
| 4        | ○         |                       | ○               |                     | F      | 61       | very low            | KIT exon 11 deletion    |
| 5        | ○         | ○                     | ○               |                     | M      | 70       | very low            | KIT exon 11 deletion    |
| 6        | ○         |                       | ○               |                     | M      | 52       | very low            | KIT exon 11 deletion    |
| 7        | ○         | ○                     | ○               |                     | M      | 35       | very low            | KIT exon 11 deletion    |
| 8        | ○         | ○                     | ○               |                     | F      | 68       | very low            | KIT exon 17 missense    |
| 9        | ○         | ○                     | ○               | ○                   | F      | 52       | low                 | wild-type               |
| 10       | ○         | ○                     | ○               |                     | M      | 75       | low                 | wild-type               |
| 11       | ○         |                       | ○               | ○                   | M      | 66       | low                 | wild-type               |
| 12       | ○         | ○                     | ○               |                     | F      | 34       | low                 | wild-type               |
| 13       | ○         |                       | ○               |                     | M      | 55       | low                 | KIT exon 11 missense    |
| 14       | ○         |                       | ○               |                     | M      | 65       | low                 | KIT exon 11 missense    |
| 15       | ○         |                       | ○               |                     | M      | 45       | low                 | KIT exon 11 missense    |
| 16       | ○         |                       | ○               |                     | M      | 56       | low                 | KIT exon 11 duplication |
| 17       | ○         |                       | ○               |                     | M      | 73       | moderate            | KIT exon 11 missense    |
| 18       | ○         |                       | ○               |                     | M      | 77       | moderate            | KIT exon 11 missense    |
| 19       | ○         |                       | ○               |                     | F      | 76       | moderate            | KIT exon 11 missense    |
| 20       | ○         |                       | ○               |                     | F      | 81       | moderate            | KIT exon 11 deletion    |
| 21       | ○         |                       | ○               | ○                   | F      | 47       | moderate            | KIT exon 11 duplication |
| 22       | ○         |                       | ○               |                     | F      | 52       | moderate            | KIT exon 11 deletion    |
| 23       | ○         |                       | ○               |                     | F      | 69       | moderate            | KIT exon 11 deletion    |

|    |   |   |   |   |   |    |          |                         |
|----|---|---|---|---|---|----|----------|-------------------------|
| 24 | ○ | ○ | ○ | ○ | M | 72 | moderate | PDGFRA exon 18 missense |
| 25 | ○ | ○ | ○ |   | F | 53 | high     | KIT exon 11 missense    |
| 26 | ○ | ○ | ○ |   | M | 66 | high     | KIT exon 11 missense    |
| 27 | ○ | ○ | ○ |   | M | 60 | high     | KIT exon 11 deletion    |
| 28 | ○ |   | ○ | ○ | M | 63 | high     | KIT exon 11 deletion    |
| 29 | ○ |   | ○ | ○ | M | 53 | high     | KIT exon 11 duplication |
| 30 | ○ | ○ | ○ |   | F | 58 | high     | KIT exon 11 insertion   |
| 31 | ○ | ○ | ○ | ○ | F | 63 | high     | KIT exon 11 insertion   |
| 32 | ○ | ○ | ○ |   | M | 76 | high     | KIT exon 11 deletion    |

---
